# Supplementary material
Source: PubMed Central journal article supplement (PMC5662018)
Supplement: NIHMS783290-supplement-1.pdf [file NIHMS783290-supplement-1.pdf]

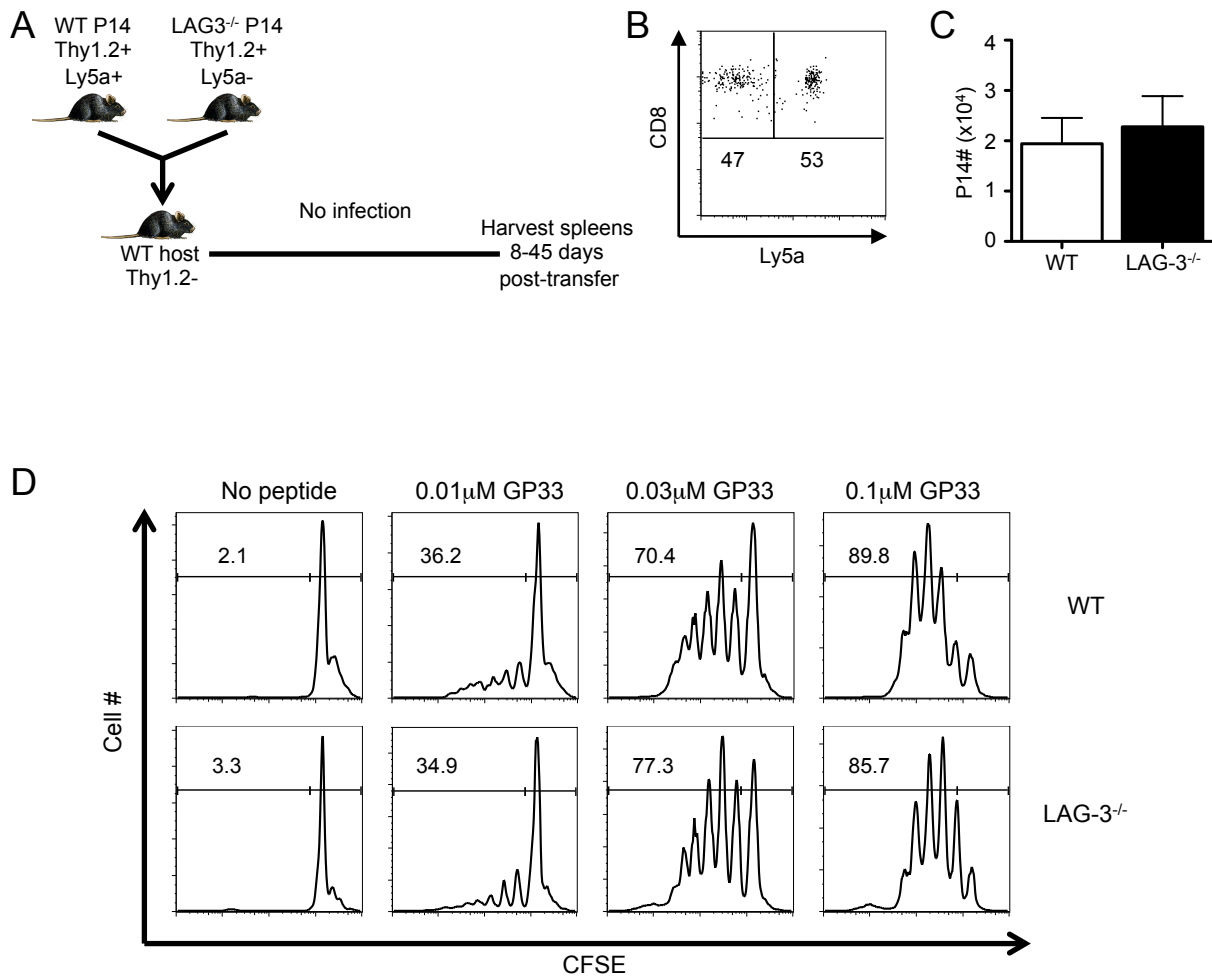

**Supplemental Figure S1. Equivalent engraftment in uninfected mice and in vitro proliferation of WT and LAG-3<sup>-/-</sup> P14 cells.** As illustrated in (A), 10<sup>6</sup> Thy1.2+Ly5a<sup>+</sup> WT P14 cells and 10<sup>6</sup> Thy1.2+Ly5a<sup>-</sup> LAG-3<sup>-/-</sup> P14 cells were co-adoptively transferred to Thy1.1<sup>+</sup> B6.PL mice. (B) An example of staining for Ly5a on the gated CD8<sup>+</sup>Thy1.2<sup>+</sup> transferred P14 cells in the spleen. (C) The total number of splenic WT and LAG-3<sup>-/-</sup> P14 cells in the spleens of uninfected mice 45 days post-transfer. These data represent 4 mice from 4 independent experiments. (D) WT and LAG3<sup>-/-</sup> were CFSE labeled and stimulated in vitro with WT splenic APCs in the presence or absence of LCMV GP<sub>33-41</sub> peptide. The amount of CFSE dilution was measured at 72 hours post stimulation. One experiment, representative of 3, is shown.

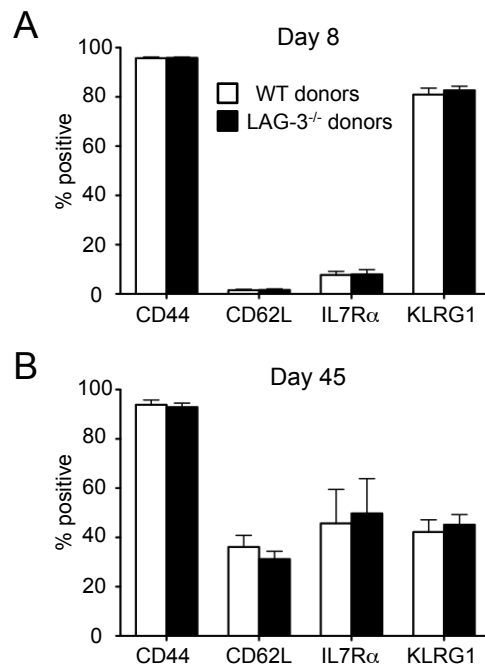

**Supplemental Figure S2 . Direct LAG-3 signaling does not affect memory and effector CD8<sup>+</sup> T cell differentiation following acute infection.**  $2 \times 10^3$  Thy1.2+Ly5a<sup>+</sup> WT P14 cells and  $2 \times 10^3$  Thy1.2+Ly5a<sup>-</sup> LAG-3<sup>-/-</sup> P14 cells mice were adoptively transferred into Thy1.1+ B6.PL mice; 4 days later the mice were infected with LCMV-Armstrong. The frequency of splenic WT and LAG-3<sup>-/-</sup> P14 cells that were positive for CD44, CD62L, IL-7R $\alpha$ , and KLRG-1 at day 8 (**A**) and day 45 (**B**) after infection. The data in panel A represent 5 mice from 2 independent experiments. The data in panel B represent 9 mice from 3 independent experiments.
